# Supplementary material for: Identifying Limiting Nutrients for Wheat Production in Halaba, Central Ethiopia
Source: Research Square preprint supplement (doi:10.21203/rs.3.rs-8012941/v1), 2025-11-21
Supplement: Supplementary file 1 [file 0976fd8234aa8777e959caaf.docx]

Appendix Table 1. The significance level of the effect of grain yield, biomass yield and yield components of wheat as influenced by nutrient type

| Effect | DF | GY (kg ha-1) | ABM (kg ha-1) | Tiller no. | Plht | Spike length | HSW |  |
| --- | --- | --- | --- | --- | --- | --- | --- | --- |
|  |  |  |  |  |  |  |  |  |
| Treatment | 9 | <.0001 | <.0001 | <.0001 | <.0001 | <.0001 | <.0001 |  |
| Treatment*Site | 63 | 0.3460 | 0.0882 | 0.0795 | 0.0074 | 0.0249 | <.0001 |  |
| Treatment*pH | 63 | 0.3460 | 0.0882 | 0.0795 | 0.0074 | 0.0249 | <.0001 |  |
| Treatment*OC | 63 | 0.3460 | 0.0882 | 0.0795 | 0.0074 | 0.0249 | <.0001 |  |
| Treatment*P | 63 | 0.3460 | 0.0882 | 0.0795 | 0.0074 | 0.0249 | <.0001 |  |

GY=grain yield; ABM=above ground biomass; Plht=plant height; SpL= spike length; HSW=hundred seeds weight; OC=organic carbon; P=phosphorus
