# Supplementary material for: Identifying Limiting Nutrients for Wheat Production in Halaba, Central Ethiopia
Source: Research Square preprint supplement (doi:10.21203/rs.3.rs-8012941/v1), 2025-11-21
Supplement: Supplementary file 2 [file 56dc3fd049e31f15c8730320.docx]

Appendix Table 7. ANOVA Table for hundred seeds weight

| **Source** | **DF** | **Type III SS** | **Mean Square** | **F Value** | **Pr > F** |
| --- | --- | --- | --- | --- | --- |
| Site | 7 | 290.296 | 41.4708 | 41.42 | <.0001 |
| Replication | 2 | 10.3 | 5.15 | 5.14 | 0.007 |
| Treatment | 9 | 363.788 | 40.4208 | 40.37 | <.0001 |
| Site*treatment | 63 | 892.913 | 14.1732 | 14.16 | <.0001 |
| Replication*treatment | 18 | 10.2 | 0.56667 | 0.57 | 0.9186 |
