# Supplementary material for: Identifying Limiting Nutrients for Wheat Production in Halaba, Central Ethiopia
Source: Research Square preprint supplement (doi:10.21203/rs.3.rs-8012941/v1), 2025-11-21
Supplement: Supplementary file 3 [file 79ef3795789c9d2a154131ac.docx]

Appendix Table 2. ANOVA Table for yield

| **Source** | **DF** | **Type III SS** | **Mean Square** | **F Value** | **Pr > F** |
| --- | --- | --- | --- | --- | --- |
| Site | 7 | 22129958.33 | 3161423 | 18.13 | <.0001 |
| Replication | 2 | 3944250 | 1972125 | 11.31 | <.0001 |
| Treatment | 9 | 38284375 | 4253819 | 24.39 | <.0001 |
| Site*treatment | 63 | 12264625 | 194677 | 1.12 | 0.294 |
| Replication*treatment | 18 | 4065750 | 225875 | 1.3 | 0.1998 |
