# Supplementary material for: Identifying Limiting Nutrients for Wheat Production in Halaba, Central Ethiopia
Source: Research Square preprint supplement (doi:10.21203/rs.3.rs-8012941/v1), 2025-11-21
Supplement: Supplementary file 4 [file d5260e67ecfed747f09e40da.docx]

Appendix Table 6. ANOVA Table for biomass

| **Source** | **DF** | **Type III SS** | **Mean Square** | **F Value** | **Pr > F** |
| --- | --- | --- | --- | --- | --- |
| Site | 7 | 102959833.3 | 1.5E+07 | 8.44 | <.0001 |
| Replication | 2 | 4524333.3 | 2262167 | 1.3 | 0.2765 |
| Treatment | 9 | 471216833.3 | 5.2E+07 | 30.03 | <.0001 |
| Site*treatment | 63 | 150628500 | 2390929 | 1.37 | 0.064 |
| Replication*treatment | 18 | 43095666.7 | 2394204 | 1.37 | 0.1541 |
