# Supplementary material for: Identifying Limiting Nutrients for Wheat Production in Halaba, Central Ethiopia
Source: Research Square preprint supplement (doi:10.21203/rs.3.rs-8012941/v1), 2025-11-21
Supplement: Supplementary file 5 [file e784052a277896a6684c8a0a.docx]

Appendix Table 4. ANOVA Table for plant height

| **Source** | **DF** | **Type III SS** | **Mean Square** | **F Value** | **Pr > F** |
| --- | --- | --- | --- | --- | --- |
| Site | 7 | 6015.868292 | 859.41 | 48.05 | <.0001 |
| Replication | 2 | 26.74075 | 13.3704 | 0.75 | 0.4754 |
| Treatment | 9 | 6262.828708 | 695.87 | 38.91 | <.0001 |
| Site*treatment | 63 | 1743.979625 | 27.6822 | 1.55 | 0.0175 |
| Replication*treatment | 18 | 168.488417 | 9.36047 | 0.52 | 0.9433 |
