# Supplementary material for: Identifying Limiting Nutrients for Wheat Production in Halaba, Central Ethiopia
Source: Research Square preprint supplement (doi:10.21203/rs.3.rs-8012941/v1), 2025-11-21
Supplement: Supplementary file 6 [file e85c9950fee640d1cd2c1815.docx]

Appendix Table 5. ANOVA Table for spike length

| **Source** | **DF** | **Type III SS** | **Mean Square** | **F Value** | **Pr > F** |
| --- | --- | --- | --- | --- | --- |
| **Site** | 7 | 61.3483 | 8.76404 | 19.74 | <.0001 |
| Replication | 2 | 3.33175 | 1.66588 | 3.75 | 0.0259 |
| Treatment | 9 | 98.7359 | 10.9707 | 24.71 | <.0001 |
| Site*treatment | 63 | 40.4405 | 0.64191 | 1.45 | 0.0378 |
| Replication*treatment | 18 | 5.98825 | 0.33268 | 0.75 | 0.7549 |
