# Supplementary material for: Identifying Limiting Nutrients for Wheat Production in Halaba, Central Ethiopia
Source: Research Square preprint supplement (doi:10.21203/rs.3.rs-8012941/v1), 2025-11-21
Supplement: Supplementary file 7 [file fc73828721e5a3d4b68dd057.docx]

Appendix Table 3. ANOVA Table for tiller

| **Source** | **DF** | **Type III SS** | **Mean Square** | **F Value** | **Pr > F** |
| --- | --- | --- | --- | --- | --- |
| Site | 7 | 128.504 | 18.3577 | 21.52 | <.0001 |
| Replication | 2 | 0.40908 | 0.20454 | 0.24 | 0.7871 |
| Treatment | 9 | 110.358 | 12.2619 | 14.38 | <.0001 |
| Site*treatment | 63 | 70.2401 | 1.11492 | 1.31 | 0.0981 |
| Replication*treatment | 18 | 12.9901 | 0.72167 | 0.85 | 0.6435 |
